# Supplementary material for: Investigating photoinduced charge transfer in double- and single-emission PbS@CdS core@shell quantum dots
Source: Royal Society of Chemistry journal article supplement (doi:10.1039/c3nr03691j), 2013-09-30
Supplement: c3nr03691j.pdf [file c3nr03691j.pdf]

## Supporting information

### Investigating Photoinduced Charge Transfer in Double- and Single-Emission PbS@CdS Core@shell Quantum Dots

*Haiguang Zhao, Hongyan Liang, Belete Atomsa Gonfa, Mohamed Chaker, Tsuneyuki Ozaki,  
Peter Tijssen, François Vidal, and Dongling Ma\**

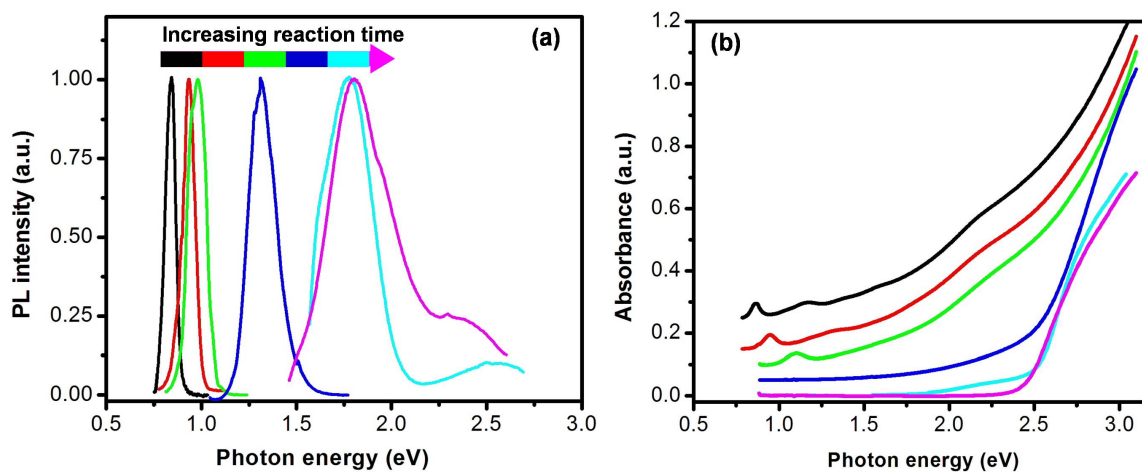

**Figure S1** Normalized PL spectra (a) and absorption spectra (b) of QDs with cation exchange reaction time. The diameter of parent PbS QDs is 5.4 nm.

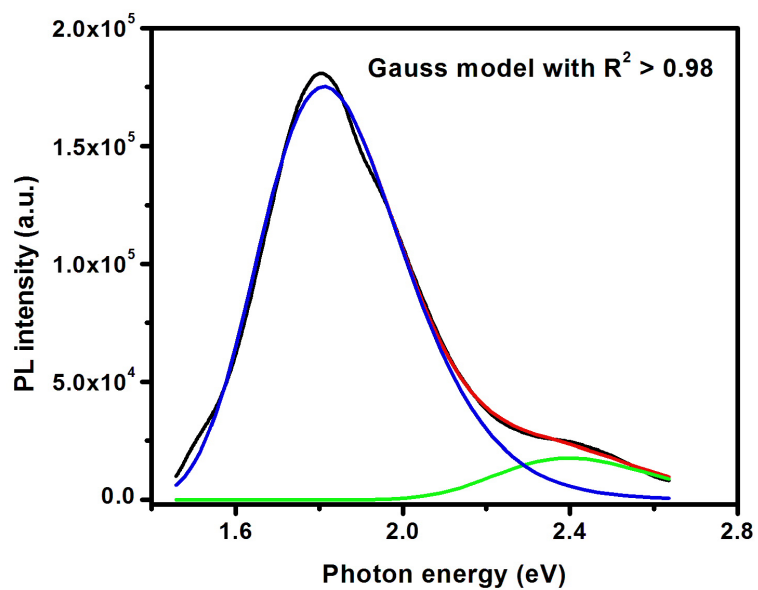

**Figure S2** PL spectra (black) of PbS@CdS QDs at 296 K. The red and green lines are fitting curves.

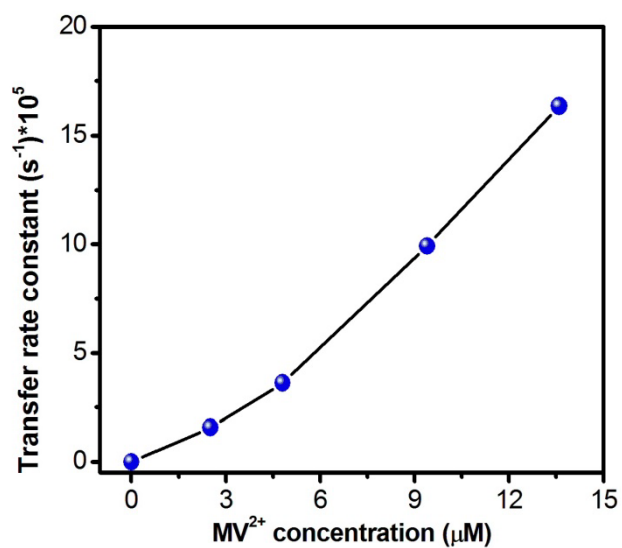

**Figure S3** Charge-transfer rate constant from PbS core to  $MV^{2+}$  as a function of  $MV^{2+}$  concentration. The concentration of QDs is 2.5  $\mu M$ .

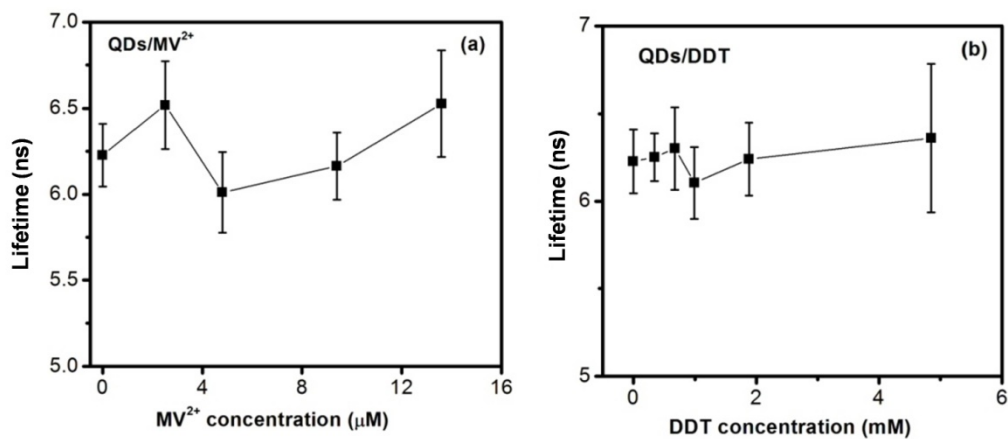

**Figure S4** PL lifetime of CdS shell as a function of concentration of MV<sup>2+</sup> (a) and DDT (b).

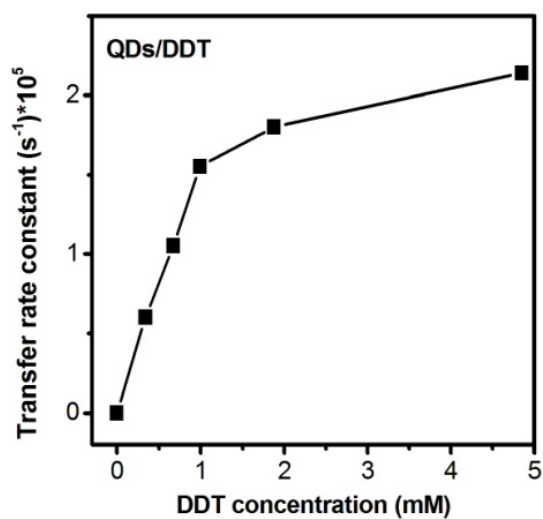

**Figure S5** Charge-transfer rate constant from PbS core to DDT as a function of DDT concentration. The concentration of QDs is 2.5 μM.

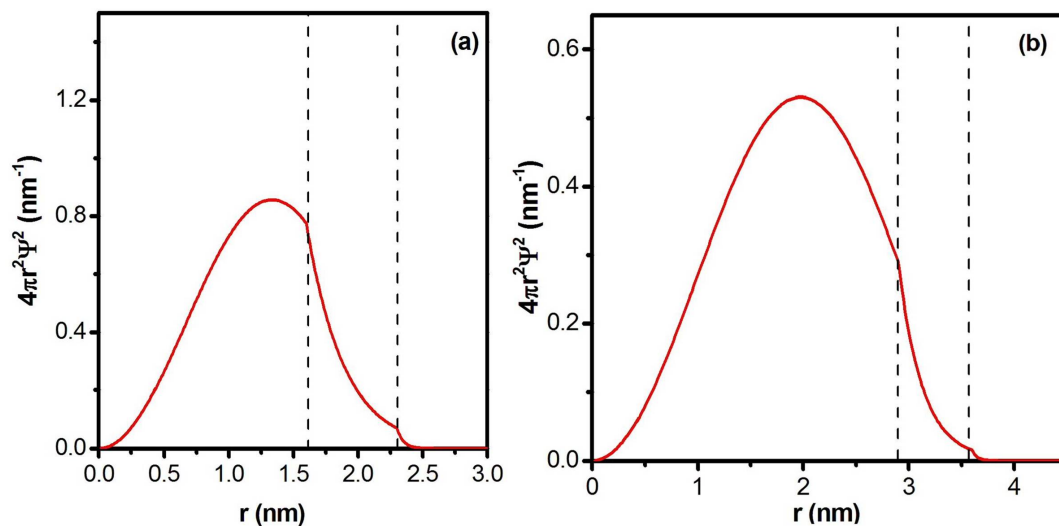

**Figure S6** Normalized radial distribution function for the 1S electron level of the PbS@CdS core@shell QDs with the core size of 3.2 nm (a) and 5.8 nm (b) in diameter. The dashed lines indicate core/shell and shell/ligand boundaries.

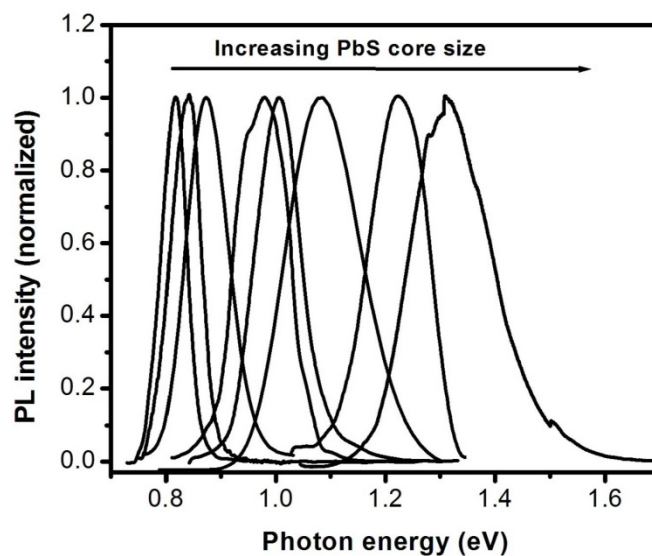

**Figure S7** PL spectra of PbS@CdS QDs with constant shell thickness of 0.7 nm and different core size.

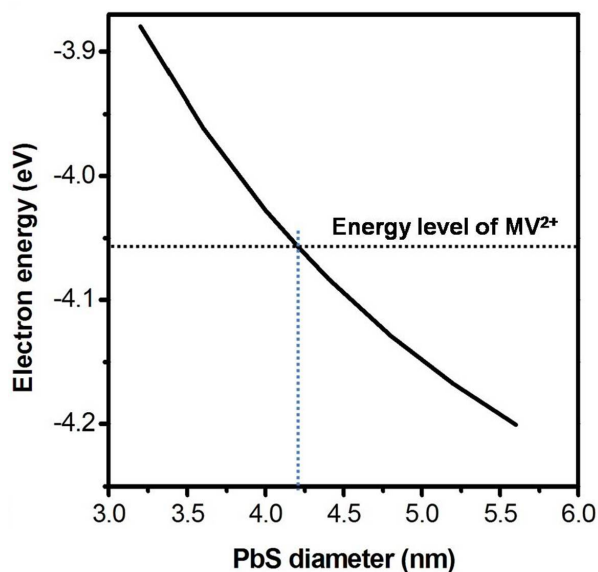

**Figure S8** Electron energy level of PbS@CdS core@shell QDs with tunable core size and constant shell thickness of 0.7 nm. The black dotted line highlights the energy level of MV<sup>2+</sup> (-4.07 eV) and the blue dotted line denotes the diameter of PbS having the same energy as MV<sup>2+</sup>.

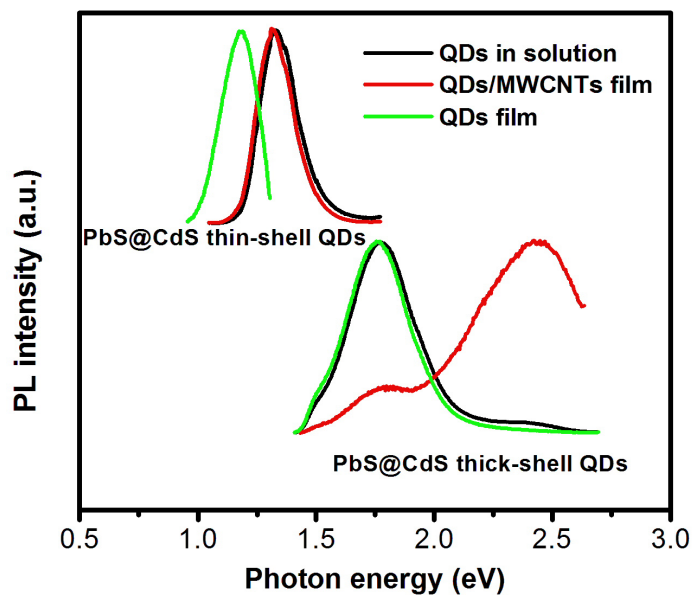

**Figure S9.** PL of thin-shell (0.7 nm) PbS@CdS and thick-shell PbS@CdS (core size: 1.2 nm; shell thickness: 2.1 nm) QDs in toluene (black), in film (green) and after hybridization with MWCNTs in film (red).
